# Supplementary material for: In Situ Cross-linking Hydrogel as a Vehicle for Retinal Progenitor Cell Transplantation
Source: PubMed Central journal article supplement — Cell Transplant. 2019 Mar 27;28(5):596–606. doi: 10.1177/0963689719825614 (PMC7103606; doi:10.1177/0963689719825614), 2019-03-27
Supplement: Supplementary_Data.pdf [file Supplementary_Data.pdf]

Supplementary Data

Table 1. Antibody List

|                       | Animal  | Company               | Concentration |
|-----------------------|---------|-----------------------|---------------|
| Ki-67                 | Rabbit  | Chemicon (ab9260)     | 1:200         |
| Caspase-3 active      | Rabbit  | Abcam (ab32042)       | 1:200         |
| Anti-GFP              | Chicken | Abcam (ab13970)       | 1:400         |
| Anti-CD45             | Rabbit  | Abcam (ab10558)       | 1:200         |
| Anti-Chicken Alexa488 | Goat    | Jackson (103-545-155) | 1:400         |
| Anti-Rabbit Alexa488  | Goat    | Jackson (111-546-144) | 1:200         |
| Anti-Rabbit Cy3       | Goat    | Jackson (111-166-003) | 1:200         |

Table 2. Two factor ANOVA of % viability, with culture conditions (Gtn-HPA vs fibronectin) and days in culture as factors

| Source             | <i>DF</i> | <i>SS</i> | <i>MS</i> | <i>F</i> | <i>p</i>   |
|--------------------|-----------|-----------|-----------|----------|------------|
| Days in Culture    | 2         | 485       | 242.5     | 6.567    | 0.0118 (*) |
| Culture conditions | 1         | 43.68     | 43.68     | 1.183    | 0.2981     |
| Interaction        | 2         | 374.2     | 187.1     | 5.067    | 0.0254 (*) |
| Residual           | 12        | 443.2     | 36.93     |          |            |

Table 3. Two factor ANOVA of % viability, with cell seeding concentrations and days in culture as factors

| Source | <i>DF</i> | <i>SS</i> | <i>MS</i> | <i>F</i> | <i>p</i> |
|--------|-----------|-----------|-----------|----------|----------|
|--------|-----------|-----------|-----------|----------|----------|

|                    |    |       |       |       |                   |
|--------------------|----|-------|-------|-------|-------------------|
| Days in culture    | 2  | 831.8 | 415.9 | 3.969 | 0.0373 (*)        |
| Cell concentration | 4  | 9399  | 2350  | 22.42 | <0.0001<br>(****) |
| Interaction        | 8  | 1538  | 192.2 | 1.834 | 0.1358            |
| Residual           | 18 | 1886  | 104.8 |       |                   |

Table 4. Two factor ANOVA of % Ki-67+ populations, with culture conditions (Gtn-HPA vs fibronectin) and days in culture as factors

| Source             | <i>DF</i> | <i>SS</i> | <i>MS</i> | <i>F</i> | <i>p</i>  |
|--------------------|-----------|-----------|-----------|----------|-----------|
| Days in Culture    | 2         | 458.1     | 229.1     | 3.376    | 0.0687    |
| Culture conditions | 1         | 425.8     | 425.8     | 6.276    | 0.0276(*) |
| Interaction        | 2         | 29.33     | 14.67     | 0.2162   | 0.8087    |
| Residual           | 12        | 814.1     | 67.84     |          |           |

Table 5. Two factor ANOVA of % activated Cas-3+ populations, with culture conditions (Gtn-HPA vs fibronectin) and days in culture as factors

| Source             | <i>DF</i> | <i>SS</i> | <i>MS</i> | <i>F</i> | <i>p</i>        |
|--------------------|-----------|-----------|-----------|----------|-----------------|
| Days in Culture    | 2         | 1752      | 876.1     | 17.01    | 0.0001<br>(***) |
| Culture conditions | 1         | 47.07     | 47.07     | 0.9137   | 0.3534          |
| Interaction        | 2         | 16.53     | 8.263     | 0.1604   | 0.8531          |
| Residual           | 16        | 824.2     | 51.51     |          |                 |
